1 **Higher Perceived Stress during the COVID-19 pandemic increased Menstrual**  
2 **Dysregulation and Menopause Symptoms**  
3  
4

5 Romina Garcia de Leon<sup>1</sup>, Alexandra Baaske<sup>2</sup>, Arianne Y Albert<sup>2</sup> PhD, Amy Booth<sup>2,6</sup>, C.  
6 Sarai Racey<sup>2,6</sup>, Shanlea Gordon<sup>2</sup>, Laurie W. Smith, Anna Gottschlich<sup>2, 6</sup>, Manish  
7 Sadarangani<sup>4,5</sup> MD, Angela Kaida<sup>2,3</sup> PhD, Gina S. Ogilvie<sup>2,6</sup> MD, Lori A. Brotto<sup>2,7,\*</sup> PhD,  
8 Liisa A.M. Galea<sup>1,8,9</sup> PhD

9 <sup>1</sup>Graduate Program in Neuroscience, University of British Columbia, Vancouver,  
10 Canada.

11 <sup>2</sup>Women's Health Research Institute, Vancouver, Canada

12 <sup>3</sup>Faculty of Health Sciences, Simon Fraser University, Burnaby, Canada

13 <sup>4</sup>Department of Pediatrics, University of British Columbia, Vancouver, Canada.

14 <sup>5</sup>Vaccine Evaluation Center, BC Children's Hospital Research Institute, Vancouver,  
15 Canada.

16 <sup>6</sup>School of Population and Public Health, University of British Columbia, Vancouver,  
17 Canada.

18 <sup>7</sup>Department of Obstetrics and Gynaecology, University of British Columbia, Vancouver,  
19 Canada.

20 <sup>8</sup>Department of Psychology, University of British Columbia, Vancouver, Canada.

21 <sup>9</sup>Djavad Mowafaghian Centre for Brain Health, University of British Columbia  
22 & Department of Pathology and Laboratory Medicine, University of British Columbia,  
23 Vancouver, Canada.

24

25

26

27 \*Correspondence can be addressed to:

28 Dr. Liisa Galea

29 Djavad Mowafaghian Centre for Brain Health

30 University of British Columbia

31 2215 Wesbrook Mall

32 Vancouver, BC, Canada

33 V6T 1Z3

34 liisa.galea@ubc.ca

35

36

37  
38  
39  
40  
41  
42  
43  
44  
45  
46  
47  
48  
49  
50  
  
51  
  
52  
53  
54  
  
55  
56  
57  
58  
59  
60  
61  
62  
63  
64  
65

## Statements and Declarations

Funding: Funding for this project was from a Michael Smith Foundation for Health Research Grant (19055) and a BC Women's Health Foundation Grant (LRZ30421) both awarded to LAB and GSO. Additional support was provided by CIHR (PJT-148662) awarded to LAMG.

Competing Interests The authors have no competing interests to declare that are relevant to the content of this article.

Ethical Approval Ethical approval was received from the BC Children's and Women's Research Ethics board (H20-01421). All methods performed as a part of this study were in accordance with the UBC Research Ethics Board guidelines.

Informed consent to participate was obtained from participants.

Data Availability Data cannot be shared publicly because of ethical restrictions. Data are available from the UBC Research Ethics Board (contact via [cwreb@bcchr.ubc.ca](mailto:cwreb@bcchr.ubc.ca)) for researchers who meet the criteria for access to confidential data.

Author Contributions: All authors contributed to the study conception and design. Material preparation, data collection and analysis were performed by Arianne Albert, Amy Booth, Shanlea Gordon, Alexandra Baaske and Romina Garcia de Leon. The first draft of the manuscript was written by Romina Garcia de Leon, Alexandra Baaske, and Liisa Galea and all authors commented on previous versions of the manuscript. All authors read and approved the final manuscript.

Acknowledgements We thank David M. Goldfarb and Melanie Murray for their contributions to this work.

## Abstract

66  
67  
68  
69  
70  
71  
72  
73  
74  
75  
76  
77  
78  
79  
80  
81  
82  
83  
84  
85  
86  
87  
88  
89  
90  
91  
92  
93  
94  
95  
96  
97  
98  
99  
100  
101  
102  
103  
104  
105  
106  
107  
108  
109

### **Purpose**

The increased stress the globe has experienced with the COVID-19 pandemic has affected mental health, disproportionately affecting women. However, how perceived stress in the first year affected menstrual and menopausal symptoms has not yet been investigated.

**Methods** Residents in British Columbia, Canada, were surveyed online as part of the COVID-19 Rapid Evidence Study of a Provincial Population-Based Cohort for Gender and Sex (RESPONSE). A subgroup (n=4171) who were assigned female sex at birth (age 25-69) and were surveyed within the first 6-12 months of the pandemic (August 2020-February 2021), prior to the widespread rollout of vaccines, were retrospectively asked if they noticed changes in their menstrual or menopausal symptoms, as well as completing validated measures of stress, depression, and anxiety.

**Results** We found that 27.8% reported menstrual cycle disturbances and 6.7% reported increased menopause symptoms. Those who scored higher on perceived stress, depression, and anxiety scales were more likely to have reproductive cycle disturbances. Free text responses revealed that reasons for disturbances were perceived to be related to the pandemic.

**Conclusions** The COVID-19 pandemic has highlighted the need to research women's health issues, such as menstruation. Our data indicates that in the first year of the pandemic, almost a third of the menstruating population reported disturbances in their cycle, which is approximately two times higher than in non-pandemic situations and four times higher than any reported changes in menopausal symptoms across that first year of the pandemic.

**Keywords** anxiety; depression; women; reproductive cycles; stress; COVID-19

110 The COVID-19 pandemic led to closures of public places, strict health  
111 regulations, and limited social interactions. These changes, along with the uncertainty of  
112 the pandemic, resulted in increased perceived levels of stress, depression, and anxiety  
113 (Brotto et al., 2021; Kujawa et al., 2020). Women and gender diverse individuals  
114 exhibited greater indices of distress, including heightened risk for mental health  
115 disorders than men throughout the COVID-19 pandemic (Brotto et al., 2021; Connor et  
116 al., 2020; Hunt et al., 2021).

117 Despite these findings, there has been minimal attention paid to the effects of  
118 sex and gender in COVID-19 studies (Brady et al., 2021; Ciarambino et al., 2021;  
119 Edelman et al., 2022). There has been a lack of research on the specific impact of  
120 SARS-CoV-2 vaccines, and pandemic response on female health (Sharp et al., 2021)  
121 which has contributed to alarming anecdotal reports of menstrual cycle irregularities  
122 following COVID-19 vaccination on social media (Male, 2021). These reported incidents  
123 underscored the importance of studying female cycles, which are now being closely  
124 examined in relation to COVID-19 vaccination (Edelman et al., 2022; Lee et al., 2021;  
125 Trogstad, 2022). However, there remains a need to examine the overall impact of the  
126 pandemic response on female menstrual cycles.

127 Menstrual cycle irregularities, perimenopause, and menopausal disturbances can  
128 be important indicators of overall physical health (Alvergne & Högqvist Tabor, 2018).  
129 Menstrual cycle irregularity is linked to metabolic dysfunction (Souza et al., 2010) and  
130 increased risk of cardiovascular disease (Solomon et al., 2002). Furthermore,  
131 vasomotor menopausal symptoms are related to white matter hyperintensities and  
132 cognitive disturbances (Thurston et al., 2016). Exposure to stress affects the  
133 hypothalamic pituitary gonadal (HPG) axes (Viau, 2002) as higher perceived stress is  
134 correlated with menopausal symptoms (Nosek et al., 2010; Weidner et al., 2020) and  
135 menstrual dysregulation (Nagma et al., 2015).

136 Thus, it is not surprising that the COVID-19 pandemic and the associated  
137 increase in stress has led to reports of disturbances to menstrual cycles (Phelan et al.,  
138 2021). Premenopausal people have reported irregularities in their menstrual cycles  
139 across different phases of the COVID-19 pandemic (Demir et al., 2021), consistent with  
140 the literature indicating that heightened perceived stress is a predictor for menstrual

141 irregularities (Yamamoto et al., 2009). Prolonged stress is also associated with an  
142 increased risk for psychiatric disorders (McEwen & Akil, 2020) and females reported  
143 higher depressive symptoms than males during the COVID-19 pandemic (Brotto et al.,  
144 2021; Pieh et al., 2020). Moreover, studies show that depressed mood is associated  
145 with menstrual irregularities (Yu et al., 2017), meaning that pandemic-related stress  
146 may be affecting mental health and menstrual irregularities simultaneously or  
147 sequentially. Given that stress and menstrual irregularities are connected (Yamamoto et  
148 al., 2009), and may play a role in mental health disturbances (Yu et al., 2017), it is  
149 important to study these relationships.

150 Heightened stress would likely have an impact on menstrual/menopausal  
151 irregularities, but to our knowledge no study to date has examined these irregularities in  
152 relation to psychosocial outcomes such as perceived stress, anxiety, or depression  
153 scores, and other factors that may play a role in perceived stress (age, number of  
154 children) within the context of the COVID-19 pandemic. We hypothesized that females  
155 would report an increase in the number of menstrual and menopausal symptoms during  
156 the first year of the pandemic, and secondly that these disturbances would be  
157 associated with stress, anxiety and depression levels.

158

## 159 **Methods**

### 160 **Participant Recruitment**

161 The Rapid Evidence Study of a Provincial Population Based COhort for GeNder and  
162 SEx (RESPPONSE) was led by the Women's Health Research Institute in British  
163 Columbia (BC). All participants provided informed consent prior to participation in  
164 RESPONSE. Ethics approval was received from The BC Children's and Women's  
165 Research Ethics Board (H20-01421). Between mid-August 2020 and March 1, 2021,  
166 participants were recruited (Ogilvie et al., 2021). Survey responses were collected  
167 anonymously, with the exception of postal code. All respondents who completed the  
168 survey were invited to enter a draw to win a \$100 e-gift card.

169 The survey was open to residents of BC aged 25 to 69 years of all sexes and genders.  
170 However, only participants who were assigned female sex at birth were eligible for this

171 particular analysis (n=5608). For analyses pertaining to menstrual changes, eligibility  
172 was restricted to: female sex, not post-menopausal, not pregnant, first six months  
173 postpartum, and not on hormonal suppression drugs (n=1866). In addition, we also  
174 conducted sensitivity analyses for menstrual changes to those people under 40 to avoid  
175 conflation with possible symptoms of perimenopause (n=810). For analyses of  
176 menopausal symptoms, eligibility was restricted to female sex and those who  
177 responded that they were postmenopausal (n=2305). In addition, we also conducted  
178 sensitivity analyses for menopause status to those people over 50 (n=1978) to avoid  
179 conflation with possible symptoms of perimenopause.

## 180 **Survey Design and Measures**

181 The survey was tested for face validity, pilot tested, and implemented using  
182 REDCap (Research Electronic Data Capture) (Harris et al., 2009). The survey consisted  
183 of multiple modules, with the present analysis focused on female reproductive health  
184 questions surrounding menstrual cycle and menopause symptoms.

185 All survey participants that were premenopausal were asked "Since the COVID-  
186 19 pandemic and subsequent public health measures in mid-March 2020, have you  
187 noticed any changes to your menstrual cycle? (yes/no/not applicable due to hormonal  
188 suppression/not applicable other)", and participants that were postmenopausal were  
189 asked "Have you noticed any changes to your postmenopausal status since mid-March  
190 2020? (yes/no)." Respondents who indicated changes to their menstrual cycle or  
191 postmenopausal status were prompted to check all that applied from a list of changes  
192 and provided with a free-text box (Survey available in Supplemental Section). All free-  
193 text responses were coded with thematic analysis using the methods outlined in Braun  
194 & Clarke (2006) to examine the potential variables influencing these changes. All  
195 responses were assigned to one of two main themes: 'Non-pandemic related' and  
196 'Pandemic control measures.' "Non-pandemic related" comments were obvious  
197 changes to their health and reproductive system at the start of the pandemic or  
198 preceding the pandemic. Alternatively, specific mentions of changes to their status or  
199 cycle, without medical reason, and stated as due to the pandemic were categorized as  
200 pandemic-related. After separating all responses into these two themes, sub-themes

201 were created to identify reproductive changes that occurred during the pandemic. Sub-  
202 themes were created if one or more respondents expressed the same theme in their  
203 free-text response.

204 Validated scores of general pandemic stress, anxiety, and depression were  
205 measured (Huang et al., 2006; Löwe et al., 2008). General pandemic stress was  
206 measured using the CoRonavlrus Health Impact Survey (CRISIS) V0.3. Participants  
207 were asked to self-report feelings of stress on a Likert scale from one (not at all) to five  
208 (extremely). Scores for this questionnaire range from 10–50 with higher scores  
209 indicating greater COVID-related stress.

210 Anxiety scores were calculated using the Generalized Anxiety Disorder  
211 questionnaire (GAD-7) The GAD-7 used self-reported feelings of anxiety on a Likert  
212 scale from zero (not at all) to three (nearly everyday) with scores ranging from 0–21.  
213 Scores above 10 suggest clinically significant levels of anxiety (Spitzer et al., 2006).

214 The Patient Health Questionnaire (PHQ-9) was used to measure self-reported  
215 symptoms of depression on a Likert scale from zero (not at all) to three (nearly  
216 everyday). Scores range from 0–27 with a score of 0–4 indicating minimal depression,  
217 5–14 indicating mild to moderate depression and 15–27 indicating moderately severe to  
218 severe depression (Brotto et al., 2021).

219 Internal consistency across data collection and Cronbach's alpha in the current  
220 sample was very good (CRISIS:  $\alpha = 0.882$ ; GAD-7: 0.889, PHQ:  $\alpha = 0.848$ ).

221

## 222 **Statistical Analyses**

223 Analyses were carried out using R v.4.1.3. (Core Team, 2022). The data set was  
224 divided into two separate groups: people with menstrual periods and those in  
225 menopause (postmenopause) as described above and summarized the percentages of  
226 those with any changes noted. We examined the relationship between mental health  
227 and changes in menopause status or menstruation using mixed-effects linear  
228 regression models with individual as random effects, and controlling for age.  
229 Significance was assessed using likelihood-ratio tests, and interactions were removed  
230 from the models if non-significant at  $p < .05$ . *Post-hoc pairwise tests were conducted to*



231 *further explore main or interaction effects with Tukey adjusted p-values.* Missing data  
232 were excluded from analyses.

233

## 234 **Results**

### 235 **Survey Participants**

236 Demographic information (age, ethnicity, gender, number of adults or children in the  
237 household, education, etc.) is seen in Table 1. Of the premenopausal participants,  
238 98.4% identified as women, 0.1% identified as men and 1.5% as gender diverse. Of the  
239 postmenopausal participants, 99% identified as women, 0.1% identified as men and  
240 0.8% as gender diverse. Given that nearly all females also identified as women, we  
241 have chosen to use the term women+ to refer to participants in our survey.

242

### 243 **Changes in menstrual symptoms**

244

245 Among our sample of premenopausal women+, 519 (27.8% of the sample without  
246 suppressed cycles) reported that they had noticed changes in their menstrual cycle  
247 since March 2020. Of these 519 respondents, 44.3% indicated that their periods were  
248 more symptomatic (painful, more bleeding, etc.), 25.4%% indicated that their periods  
249 were longer, 23.7%% said they were having fewer periods than before the pandemic,  
250 21.8% noticed having more periods than normal, 15.7% said their periods had gotten  
251 shorter, 2.3% said their periods were less symptomatic. Options were not mutually  
252 exclusive and we received 784 answers from a potential 519 respondents. Moreover,  
253 17.8% used free-text space to explain the changes to their menstrual cycles that they  
254 had noticed. The analysis of the free text responses indicated that there were twice as  
255 many respondents that indicated their changes in symptoms were due to the *Pandemic*  
256 *control measures*(Table 2).

257

258 As those aged >40 years are more likely to be experiencing perimenopause, which  
259 could create menstrual disturbances independent of psychosocial stress, we undertook  
260 a sensitivity analysis of those who were less than 40 years old. Of this subset (n=810),  
261 29.2% (n=237) reported changes in their menstrual cycle since the pandemic began. In



262 addition, 52.7% indicated that their periods were more symptomatic (painful, more  
263 bleeding, etc.), 32.1% indicated that their periods had gotten longer, 13.1% said they  
264 were having fewer periods than normal, 20.7% noticed having more periods than  
265 normal, 19.0% said their periods had gotten shorter, 2.1% said their periods were less  
266 symptomatic, and 19.8% used free-text space to explain the changes to their menstrual  
267 cycles that they had noticed. Options were not mutually exclusive and we received 378  
268 answers from a potential 237 respondents.

269

### 270 **Changes in menopausal symptoms**

271

272 Among our sample of postmenopausal females (n = 2305), 155 (6.7%) reported that  
273 they noticed changes in their postmenopausal status since mid-March 2020. Of this  
274 subset (n=155), 16.1% indicated that they started bleeding again and 12.3% indicated  
275 that they were experiencing “more menstrual symptoms”. Additionally, 72.9% used free-  
276 text space to explain the changes to their postmenopausal status. The analysis of the  
277 free-text responses revealed that there were four times as many respondents that  
278 indicated changes to postmenopausal status falling into the “due to the pandemic  
279 control measures” category (Table 3).

280

281 As those aged <50 years are more likely to be experiencing perimenopause, which  
282 could create menopausal disturbances independent of psychosocial stress, a sensitivity  
283 analysis that restricted to those ≥50 (n = 1978) was conducted. Of this subset, there  
284 were 127 (6.4%) who reported that they had noticed changes in their postmenopausal  
285 status since before the pandemic. Of this subset (n=127), 18.1% indicated that they  
286 started bleeding again and 7.9% indicated that they were experiencing “more menstrual  
287 symptoms”. Additionally, 71.7% of this subset used free-text space to explain the  
288 changes to their postmenopausal status that they had noticed. Analysis of these free-  
289 text responses revealed that 19.8% of reported changes were associated with the onset  
290 of the pandemic and 80.1% were not not pandemic-related.

291

292 **Higher pandemic stress, anxiety, and depression symptoms were related to**  
293 **more disturbances in menstrual and menopausal symptoms**

294  
295 We next examined whether any changes to menstrual or menopause symptoms were  
296 related to anxiety, depression, or perceived stress. We found that across both groups,  
297 more disturbances in their cycles indicated they scored higher on each of the  
298 psychosocial measures, with premenopausal women+ scoring higher than  
299 postmenopausal women+. For premenopausal women+ pandemic stress were 3.9  
300 (95%CI:3.1-4.8) points higher, anxiety scores were 2.0 (95%CI: 1.6-2.4) points higher,  
301 and depression scores were 2.4 (95%CI: 2.0-2.8) points higher on average in those that  
302 reported menstrual cycle disturbances(Figure 1 A-C). For postmenopausal women+,  
303 pandemic stress scores were 2.9 (95%CI: 1.9-3.9) points higher, anxiety scores were  
304 1.5 (95%CI: 0.9-2.1) points higher, depression scores were 1.8 (95%CI: 1.2-2.5) points  
305 higher on average in those that reported changes to their menopausal status (Figure  
306 1D-F).

### 307 **Relationship of menstrual or postmenopausal disturbances to number of children** 308

309 As previous studies have found an association between number of children and stress  
310 (Bigalke et al., 2020), we also examined whether the number of children influenced our  
311 results. We ran these analyses in premenstrual women+ that were under 40, choosing  
312 to exclude individuals who may have been perimenopausal based on age. There was  
313 no significant relationship between the number of children and whether or not the  
314 participant indicated they had disturbances to their menstrual cycle ( $p=0.100$ ). We next  
315 examined whether or not there was a relationship between menopausal disturbances  
316 and the number of children. There was a significant relationship ( $p=0.007$ ), however  
317 when we used age as a covariate the effect was no longer significant ( $p=0.409$ ). There  
318 were also no significant relationships between the number of children and pandemic  
319 stress scores, after controlling for age and changes to menstruation or menopause  
320 ( $p=0.167$  and  $0.400$ , respectively).

321

322

### 323 **Discussion**

324 In a sample of 4171 surveyed women+ in BC that met our inclusion criteria,  
325 27.8% of naturally cycling women+ had a disruption in their menstrual cycle and 6.7% of

326 postmenopausal women+ indicated a change in their status, across the first year of the  
327 COVID-19 pandemic and prior to widespread rollout of COVID-19 vaccines. These  
328 disturbances to the reproductive cycles were related to higher levels of anxiety,  
329 depression, and perceived stress, but not to the number of children, in both pre and  
330 postmenopausal women+. Premenopausal women+ with menstrual cycle phase  
331 disturbances scored higher on perceived stress (3.4 points), anxiety (2.0) and  
332 depression (2.4) measures. We previously found that women had higher levels of  
333 perceived stress, depression, and anxiety compared to men, using data from the same  
334 source (Brotto et al., 2021). Our findings here indicate that both pre and  
335 postmenopausal women+ with higher levels of mental distress experienced greater  
336 disturbances in reproductive cycles. Stress has pervasive effects on mental and  
337 physical health and our results add to the growing data that female-specific reproductive  
338 cycles are also affected.

339

340 *During the first year of the pandemic menstrual cycle disturbances were related to*  
341 *distress, anxiety and depression.*

342 We found that in the first year of the pandemic, 27.8% of the naturally-cycling  
343 women+ surveyed had disturbances to their menstrual cycles. This is slightly lower than  
344 other surveys suggesting that 44% of women (including women that were younger than  
345 our own cohort 18-24) noticed changes in their cycles using fertility tracking devices  
346 (Buran & Gerçek Öter, 2022; Haile et al., 2022). Other studies have suggested that the  
347 baseline rates of menstrual disturbances are ~15% (Toffel et al., 2013, Kim et al., 2018).  
348 Premenopausal women in our study with reported menstrual disturbances had 3.4 times  
349 higher perceived stress. Our findings are consistent with another study that showed an  
350 association between perceived stress during the COVID-19 pandemic and menstrual  
351 irregularities (Ozimek et al., 2022). Although the literature suggests that parental  
352 responsibility increases perceived stress in women compared to men (Bigalke et al.,  
353 2020), we found no evidence that there was a significant relationship between the  
354 number of children, and changes in the menstrual cycle or in perceived stress in  
355 women+ younger than 40. Our data also indicate that anxiety scores were 2 points

356 higher and depression scores were 2.4 points higher on average in those that reported  
357 menstrual cycle disturbances. As can be seen in Figure 1 this was enough of a change  
358 to push the average depression scores to mild-moderate depression, however the  
359 values for anxiety remain below a clinical diagnosis. Our findings add to the growing  
360 body of research on the relationship between pandemic-related stress and menstrual  
361 disturbances.

362

363 *Increased menopause symptoms were associated with increased perceived stress,*  
364 *anxiety and depression*

365 We also found that fewer than ten percent of postmenopausal women+ noticed  
366 changes to their menopausal status during the first year of the pandemic. Those who  
367 noticed changes in their status reported more menopausal symptoms, and furthermore  
368 these individuals were more likely to score higher on perceived stress, depression and  
369 anxiety. Perimenopause is thought to be a time of heightened risk for mental health  
370 disruption (Schmidt, 2005) and those with menopausal symptoms may be at greater risk  
371 to develop psychiatric disorders (Cohen et al., 2006).

372 The percentage of disturbances in reproductive symptoms was four times greater  
373 in our sample of premenopausal (27.8%) compared to postmenopausal women+ (6.7%)  
374 . It is not clear why this large difference occurred but may be due to age, influence of  
375 stress on the HPG axis, or level of stress overall. Indeed, other studies, including data  
376 from this same sample, have found that perceived stress, anxiety and depression  
377 scores were reduced with increasing age (Brotto et al., 2021; Tang et al., 2022). Thus,  
378 our findings of greater premenopausal versus postmenopausal disturbances aligns with  
379 data indicating mental health indices were lower for older adults during the first year of  
380 the pandemic (Brotto et al., 2021). Hypothalamic-pituitary-adrenal (HPA) axis activation,  
381 via stress, initially stimulates, and chronic activation inhibits the HPG resulting in  
382 menstrual abnormalities (Toufexis et al., 2014) and as these interactions vary across  
383 age (Heck & Handa, 2019; Phumsatitpong et al., 2021), this may also explain our  
384 findings as there would have been less HPA activation in the postmenopausal women+  
385 in our sample. However, it is also possible that the premenopausal versus

386 postmenopausal difference was due, in part, to the differences in the question posed to  
387 the two different groups, as our survey asked about menopause status rather than  
388 symptoms of menopause.

389

### 390 *Relevance and Limitations*

391 Allostatic load, or the cumulative burden of a variety of stressors, affects  
392 cardiovascular and metabolic health (Guidi et al., 2021; McEwen, 1998). However, it is  
393 important to acknowledge that female-specific factors, such as menstruation and  
394 menopause, are also impacted by chronic stress. Others have postulated that female  
395 health is cyclical as menstrual patterns correspond to changes in immune system  
396 function (Alvergne & Högqvist Tabor, 2018). Moreover, there are specific interactions  
397 between gonadal hormones and immune cells (Baker et al., 2004) emphasizing  
398 important crosstalk (Arambula & McCarthy, 2020). It is possible that the mechanism  
399 behind stress and menstrual changes also involves glucocorticoid receptors in the  
400 endometrium (Michael & Papageorghiou, 2008). Although SARS-CoV-2 infection and  
401 vaccines use can also disrupt reproductive cycles in the short term (Edelman et al.,  
402 2022; Lee et al., 2021), we do not believe this influenced our findings because we found  
403 that the seroprevalence of previous infection in this cohort was 2.9% (Racey et al.,  
404 submitted) and vaccines were not widely available to the general BC population at the  
405 time of this survey.

406

407 There are limitations to our study. This was a retrospective survey that required  
408 online access. However, our findings of high levels of menstrual disturbances is  
409 consistent with other studies using data from menstrual tracking apps (Haile et al.,  
410 2022). In our survey we did not obtain information on the normal levels of menstrual or  
411 menopausal symptoms pre-COVID19 pandemic hence we are only able to cross study  
412 comparisons.

413

414 This survey was limited to residents of the province of BC and our unique  
415 patterns of pandemic restriction measures may have impacted results. We also asked  
416 about menopausal status rather than menopausal symptoms and this may have

417 reduced responses to this population of postmenopausal people. In our survey we also  
418 did not clarify why people had suppressed cycles (e.g which type of hormonal  
419 contraceptives, gender affirming hormone therapy) which future studies could explore.

420  
421 We cannot rule out a selection bias in this study, and it is possible that individuals  
422 who experienced higher stress pre- and post pandemic were more likely to participate.  
423 Similarly, those with menstrual abnormalities may be hyper-aware of their menstrual  
424 cycle and led them to participate in the current study.

425

## 426 **Conclusions**

427 The stress associated with the pandemic has impacted both our physical and mental  
428 health and our findings suggest that this includes female-specific physical health  
429 characteristics. It is imperative to continue advancing the literature on external and  
430 internal factors impacting women's reproductive health. Factors that can mitigate  
431 against the effects of stress such as social support (Zhao et al., 2019) and exercise  
432 (Belgen Kaygısız et al., 2020), which were limited during the initial phases of the  
433 pandemic, may have exacerbated the negative outcomes on reproductive cycles for  
434 women+. Given the lack of attention to women's health data (Rechlin et al., 2021), more  
435 studies examining female-specific health indices are needed in the literature.

436

437

438 References

- 439  
440  
441 Alvergne, A., & Högqvist Tabor, V. (2018). Is Female Health Cyclical? Evolutionary Perspectives  
442 on Menstruation. *Trends in Ecology & Evolution*, 33(6), 399–414.  
443 <https://doi.org/10.1016/j.tree.2018.03.006>
- 444 Arambula, S. E., & McCarthy, M. M. (2020). Neuroendocrine-Immune Crosstalk Shapes Sex-  
445 Specific Brain Development. *Endocrinology*, 161(6), bqaa055.  
446 <https://doi.org/10.1210/endocr/bqaa055>
- 447 Baker, A. E., Brautigam, V. M., & Watters, J. J. (2004). Estrogen modulates microglial  
448 inflammatory mediator production via interactions with estrogen receptor beta.  
449 *Endocrinology*, 145(11), 5021–5032. <https://doi.org/10.1210/en.2004-0619>
- 450 Bigalke, J. A., Greenlund, I. M., & Carter, J. R. (2020). Sex differences in self-report anxiety and  
451 sleep quality during COVID-19 stay-at-home orders. *Biology of Sex Differences*, 11(1), 56.  
452 <https://doi.org/10.1186/s13293-020-00333-4>
- 453 Brady, E., Nielsen, M. W., Andersen, J. P., & Oertelt-Prigione, S. (2021). Lack of consideration of  
454 sex and gender in COVID-19 clinical studies. *Nature Communications*, 12(1), 4015.  
455 <https://doi.org/10.1038/s41467-021-24265-8>
- 456 Braun, V., & Clarke, V. (2006). Using thematic analysis in psychology. *Qualitative Research in*  
457 *Psychology*, 3(2), 77–101. <https://doi.org/10.1191/1478088706qp063oa>
- 458 Brotto, L. A., Chankasingh, K., Baaske, A., Albert, A., Booth, A., Kaida, A., Smith, L. W., Racey, S.,  
459 Gottschlich, A., Murray, M. C. M., Sadarangani, M., Ogilvie, G. S., & Galea, L. (2021). *The*  
460 *influence of sex, gender, age, and ethnicity on psychosocial factors and substance use*



- 461 throughout phases of the COVID-19 pandemic (p. 2021.06.08.21258572). medRxiv.  
462 <https://doi.org/10.1101/2021.06.08.21258572>
- 463 Buran, G., & Gerçek Öter, E. (2022). Impact of the awareness and fear of COVID-19 on  
464 menstrual symptoms in women: A cross-sectional study. *Health Care for Women*  
465 *International*, 43(4), 413–427. <https://doi.org/10.1080/07399332.2021.2004149>
- 466 Ciarambino, T., Para, O., & Giordano, M. (2021). Immune system and COVID-19 by sex  
467 differences and age. *Women's Health (London, England)*, 17, 17455065211022262.  
468 <https://doi.org/10.1177/17455065211022262>
- 469 Cohen, L. S., Soares, C. N., Vitonis, A. F., Otto, M. W., & Harlow, B. L. (2006). Risk for New Onset  
470 of Depression During the Menopausal Transition: The Harvard Study of Moods and  
471 Cycles. *Archives of General Psychiatry*, 63(4), 385–390.  
472 <https://doi.org/10.1001/archpsyc.63.4.385>
- 473 Connor, J., Madhavan, S., Mokashi, M., Amanuel, H., Johnson, N. R., Pace, L. E., & Bartz, D.  
474 (2020). Health risks and outcomes that disproportionately affect women during the  
475 Covid-19 pandemic: A review. *Social Science & Medicine (1982)*, 266, 113364.  
476 <https://doi.org/10.1016/j.socscimed.2020.113364>
- 477 Core Team, R. (2022). *R: A language and environment for statistical computing*. R Foundation  
478 for Statistical Computing Vienna, Austria. <https://www.r-project.org/>
- 479 Demir, O., Sal, H., & Comba, C. (2021). Triangle of COVID, anxiety and menstrual cycle. *Journal*  
480 *of Obstetrics and Gynaecology: The Journal of the Institute of Obstetrics and*  
481 *Gynaecology*, 41(8), 1257–1261. <https://doi.org/10.1080/01443615.2021.1907562>
- 482 Edelman, A., Boniface, E. R., Benhar, E., Han, L., Matteson, K. A., Favaro, C., Pearson, J. T., &

- 483 Darney, B. G. (2022). Association Between Menstrual Cycle Length and Coronavirus  
484 Disease 2019 (COVID-19) Vaccination: A U.S. Cohort. *Obstetrics & Gynecology*,  
485 10.1097/AOG.0000000000004695. <https://doi.org/10.1097/AOG.0000000000004695>
- 486 Guidi, J., Lucente, M., Sonino, N., & Fava, G. A. (2021). Allostatic Load and Its Impact on Health:  
487 A Systematic Review. *Psychotherapy and Psychosomatics*, 90(1), 11–27.  
488 <https://doi.org/10.1159/000510696>
- 489 Haile, L., van de Roemer, N., Gemzell-Danielsson, K., Perelló Capó, J., Lete Lasa, I., Vannuccini,  
490 S., Koch, M. C., Hildebrandt, T., & Calaf, J. (2022). The global pandemic and changes in  
491 women’s reproductive health: An observational study. *The European Journal of*  
492 *Contraception & Reproductive Health Care*, 0(0), 1–5.  
493 <https://doi.org/10.1080/13625187.2021.2024161>
- 494 Harris, P. A., Taylor, R., Thielke, R., Payne, J., Gonzalez, N., & Conde, J. G. (2009). Research  
495 electronic data capture (REDCap)—A metadata-driven methodology and workflow  
496 process for providing translational research informatics support. *Journal of Biomedical*  
497 *Informatics*, 42(2), 377–381. <https://doi.org/10.1016/j.jbi.2008.08.010>
- 498 Heck, A. L., & Handa, R. J. (2019). Sex differences in the hypothalamic-pituitary-adrenal axis’  
499 response to stress: An important role for gonadal hormones.  
500 *Neuropsychopharmacology: Official Publication of the American College of*  
501 *Neuropsychopharmacology*, 44(1), 45–58. <https://doi.org/10.1038/s41386-018-0167-9>
- 502 Heim, C., Newport, D. J., Mletzko, T., Miller, A. H., & Nemeroff, C. B. (2008). The link between  
503 childhood trauma and depression: Insights from HPA axis studies in humans.  
504 *Psychoneuroendocrinology*, 33(6), 693–710.

- 505 <https://doi.org/10.1016/j.psyneuen.2008.03.008>
- 506 Huang, F. Y., Chung, H., Kroenke, K., Delucchi, K. L., & Spitzer, R. L. (2006). Using the patient  
507 health questionnaire-9 to measure depression among racially and ethnically diverse  
508 primary care patients. *Journal of General Internal Medicine*, 21(6), 547–552.
- 509 Hunt, C., Gibson, G. C., Vander Horst, A., Cleveland, K. A., Wawrosch, C., Granot, M., Kuhn, T.,  
510 Woolverton, C. J., & Hughes, J. W. (2021). Gender diverse college students exhibit higher  
511 psychological distress than male and female peers during the novel coronavirus (COVID-  
512 19) pandemic. *Psychology of Sexual Orientation and Gender Diversity*, 8(2), 238–244.  
513 <https://doi.org/10.1037/sgd0000461>
- 514 Kujawa, A., Green, H., Compas, B. E., Dickey, L., & Pegg, S. (2020). Exposure to COVID-19  
515 pandemic stress: Associations with depression and anxiety in emerging adults in the  
516 United States. *Depression and Anxiety*, 37(12), 1280–1288.  
517 <https://doi.org/10.1002/da.23109>
- 518 Lee, K. M., Junkins, E. J., Fatima, U. A., Cox, M. L., & Clancy, K. B. (2021). *Characterizing*  
519 *menstrual bleeding changes occurring after SARS-CoV-2 vaccination* (p.  
520 2021.10.11.21264863). medRxiv. <https://doi.org/10.1101/2021.10.11.21264863>
- 521 Löwe, B., Decker, O., Müller, S., Brähler, E., Schellberg, D., Herzog, W., & Herzberg, P. Y. (2008).  
522 Validation and standardization of the Generalized Anxiety Disorder Screener (GAD-7) in  
523 the general population. *Medical Care*, 266–274.
- 524 Male, V. (2021). Menstrual changes after covid-19 vaccination. *BMJ*, 374, n2211.  
525 <https://doi.org/10.1136/bmj.n2211>
- 526 McEwen, B. S. (1998). Stress, adaptation, and disease. Allostasis and allostatic load. *Annals of*

- 527 *the New York Academy of Sciences*, 840, 33–44. <https://doi.org/10.1111/j.1749->
- 528 6632.1998.tb09546.x
- 529 McEwen, B. S., & Akil, H. (2020). Revisiting the Stress Concept: Implications for Affective
- 530 Disorders. *Journal of Neuroscience*, 40(1), 12–21.
- 531 <https://doi.org/10.1523/JNEUROSCI.0733-19.2019>
- 532 Michael, A. E., & Papageorghiou, A. T. (2008). Potential significance of physiological and
- 533 pharmacological glucocorticoids in early pregnancy. *Human Reproduction Update*, 14(5),
- 534 497–517. <https://doi.org/10.1093/humupd/dmn021>
- 535 Montano, L. T., & Acebes, K. M. L. (2020). Covid stress predicts depression, anxiety and stress
- 536 symptoms of Filipino respondents. *International Journal of Research in Business and*
- 537 *Social Science*, 9(4), 78–103. <https://doi.org/10.20525/ijrbs.v9i4.773>
- 538 Nagma, S., Kapoor, G., Bharti, R., Batra, A., Batra, A., Aggarwal, A., & Sablok, A. (2015). To
- 539 Evaluate the Effect of Perceived Stress on Menstrual Function. *Journal of Clinical and*
- 540 *Diagnostic Research*: JCDR, 9(3), QC01–QC03.
- 541 <https://doi.org/10.7860/JCDR/2015/6906.5611>
- 542 Nosek, M., Kennedy, H. P., Beyene, Y., Taylor, D., Gilliss, C., & Lee, K. (2010). The effects of
- 543 perceived stress and attitudes toward menopause and aging on symptoms of
- 544 menopause. *Journal of Midwifery & Women's Health*, 55(4), 328–334.
- 545 <https://doi.org/10.1016/j.jmwh.2009.09.005>
- 546 Ogilvie, G. S., Gordon, S., Smith, L. W., Albert, A., Racey, C. S., Booth, A., Gottschlich, A.,
- 547 Goldfarb, D., Murray, M. C. M., Galea, L. A. M., Kaida, A., Brotto, L. A., & Sadarangani, M.
- 548 (2021). Intention to receive a COVID-19 vaccine: Results from a population-based survey

- 549 in Canada. *BMC Public Health*, 21(1), 1017. [https://doi.org/10.1186/s12889-021-11098-](https://doi.org/10.1186/s12889-021-11098-9)
- 550 9
- 551 Ozimek, N., Velez, K., Anvari, H., Butler, L., Goldman, K. N., & Weitowich, N. C. (2022). Impact of
- 552 stress on menstrual cyclicity during the coronavirus disease 2019 pandemic: A survey
- 553 study. *Journal of Women's Health*, 31(1), 84–90.
- 554 Phelan, N., Behan, L. A., & Owens, L. (2021). The Impact of the COVID-19 Pandemic on
- 555 Women's Reproductive Health. *Frontiers in Endocrinology*, 12, 642755.
- 556 <https://doi.org/10.3389/fendo.2021.642755>
- 557 Phumsatitpong, C., Wagenmaker, E. R., & Moenter, S. M. (2021). Neuroendocrine interactions
- 558 of the stress and reproductive axes. *Frontiers in Neuroendocrinology*, 63, 100928.
- 559 <https://doi.org/10.1016/j.yfrne.2021.100928>
- 560 Pieh, C., Budimir, S., & Probst, T. (2020). The effect of age, gender, income, work, and physical
- 561 activity on mental health during coronavirus disease (COVID-19) lockdown in Austria.
- 562 *Journal of Psychosomatic Research*, 136, 110186.
- 563 <https://doi.org/10.1016/j.jpsychores.2020.110186>
- 564 Racey, C., Booth, A., Albert, A., Smith, L., Krajdén M, M. M., Côté, H., Gottschlich, A.,
- 565 Sadarangani, A., Galea, L., Kaida, A., Brotto, L., & Ogilvie, G. ((Submitted)). Seropositivity
- 566 of SARS-CoV-2 in an unvaccinated cohort in British Columbia, Canada: Cross-sectional
- 567 survey with dried blood spot samples. *BMJ Open*.
- 568 Rechlin, R. K., Splinter, T. F., Hodges, T. E., Albert, A. Y., & Galea, L. A. (2021). Harnessing the
- 569 power of sex differences: What a difference ten years did not make. *BioRxiv*.
- 570 Salari, N., Hosseini-Far, A., Jalali, R., Vaisi-Raygani, A., Rasoulpoor, S., Mohammadi, M.,

- 571 Rasoulpoor, S., & Khaledi-Paveh, B. (2020). Prevalence of stress, anxiety, depression  
572 among the general population during the COVID-19 pandemic: A systematic review and  
573 meta-analysis. *Globalization and Health*, 16(1), 57. [https://doi.org/10.1186/s12992-020-](https://doi.org/10.1186/s12992-020-00589-w)  
574 00589-w
- 575 Schmidt, P. J. (2005). Mood, depression, and reproductive hormones in the menopausal  
576 transition. *The American Journal of Medicine*, 118(12, Supplement 2), 54–58.  
577 <https://doi.org/10.1016/j.amjmed.2005.09.033>
- 578 Sharp, G. C., Fraser, A., Sawyer, G., Kountourides, G., Easey, K. E., Ford, G., Olszewska, Z., Howe,  
579 L. D., Lawlor, D. A., Alvergne, A., & Maybin, J. A. (2021). The COVID-19 pandemic and the  
580 menstrual cycle: Research gaps and opportunities. *International Journal of*  
581 *Epidemiology*, dyab239. <https://doi.org/10.1093/ije/dyab239>
- 582 Solomon, C. G., Hu, F. B., Dunaif, A., Rich-Edwards, J. E., Stampfer, M. J., Willett, W. C., Speizer,  
583 F. E., & Manson, J. E. (2002). Menstrual Cycle Irregularity and Risk for Future  
584 Cardiovascular Disease. *The Journal of Clinical Endocrinology & Metabolism*, 87(5),  
585 2013–2017. <https://doi.org/10.1210/jcem.87.5.8471>
- 586 Souza, F. A. C., Dias, R., Fernandes, C. E., Pimentel, F., & Dias, D. (2010). Menstrual irregularity:  
587 A possible clinical marker of metabolic dysfunction in women with class III obesity.  
588 *Gynecological Endocrinology*, 26(10), 768–772.  
589 <https://doi.org/10.3109/09513590.2010.487603>
- 590 Spitzer, R. L., Kroenke, K., Williams, J. B., & Löwe, B. (2006). A brief measure for assessing  
591 generalized anxiety disorder: The GAD-7. *Archives of Internal Medicine*, 166(10), 1092–  
592 1097.

- 593 Tang, Q., Wang, Y., Li, J., Luo, D., Hao, X., & Xu, J. (2022). Effect of Repeated Home Quarantine  
594 on Anxiety, Depression, and PTSD Symptoms in a Chinese Population During the COVID-  
595 19 Pandemic: A Cross-sectional Study. *Frontiers in Psychiatry, 13*.  
596 <https://www.frontiersin.org/article/10.3389/fpsyt.2022.830334>
- 597 Thurston, R. C., Aizenstein, H. J., Derby, C. A., Sejdić, E., & Maki, P. M. (2016). Menopausal Hot  
598 Flashes and White Matter Hyperintensities. *Menopause (New York, N.Y.), 23*(1), 27–32.  
599 <https://doi.org/10.1097/GME.0000000000000481>
- 600 Toufexis, D., Rivarola, M. A., Lara, H., & Viau, V. (2014). Stress and the Reproductive Axis.  
601 *Journal of Neuroendocrinology, 26*(9), 573–586. <https://doi.org/10.1111/jne.12179>
- 602 Trogstad, L. (2022). *Increased Occurrence of Menstrual Disturbances in 18- to 30-Year-Old*  
603 *Women after COVID-19 Vaccination* (SSRN Scholarly Paper ID 3998180). Social Science  
604 Research Network. <https://doi.org/10.2139/ssrn.3998180>
- 605 Viau, V. (2002). Functional Cross-Talk Between the Hypothalamic-Pituitary-Gonadal and -  
606 Adrenal Axes. *Journal of Neuroendocrinology, 14*(6), 506–513.  
607 <https://doi.org/10.1046/j.1365-2826.2002.00798.x>
- 608 Weidner, K., Bittner, A., Beutel, M., Goeckenjan, M., Brähler, E., & Garthus-Niegel, S. (2020).  
609 The role of stress and self-efficacy in somatic and psychological symptoms during the  
610 climacteric period—Is there a specific association? *Maturitas, 136*, 1–6.  
611 <https://doi.org/10.1016/j.maturitas.2020.03.004>
- 612 Yamamoto, K., Okazaki, A., Sakamoto, Y., & Funatsu, M. (2009). The relationship between  
613 premenstrual symptoms, menstrual pain, irregular menstrual cycles, and psychosocial  
614 stress among Japanese college students. *Journal of Physiological Anthropology, 28*(3),



615 129–136. <https://doi.org/10.2114/jpa2.28.129>

616 Yu, M., Han, K., & Nam, G. E. (2017). The association between mental health problems and

617 menstrual cycle irregularity among adolescent Korean girls. *Journal of Affective*

618 *Disorders*, 210, 43–48. <https://doi.org/10.1016/j.jad.2016.11.036>

619

620 **Table 1.** Demographic characteristics of respondents.  
 621 + denotes GenderQueer, Agender, Two-Spirit, other  
 622

| Age                                                   | Menstruation Changes |                   |                | P-value | Postmenopausal Changes |                  |                |          |
|-------------------------------------------------------|----------------------|-------------------|----------------|---------|------------------------|------------------|----------------|----------|
|                                                       | Total                | No                | Yes            |         | Total                  | No               | Yes            | P-value  |
|                                                       | <b>No. 1,866</b>     | <b>No. 1,347</b>  | <b>No. 519</b> |         | <b>No. 2,305</b>       | <b>No. 2,150</b> | <b>No. 155</b> |          |
| 25-29                                                 | 183 (9.8%)           | <b>127 (9.4%)</b> | 56 (10.8%)     | 0.14    | 5 (0.2%)               | 4 (0.2%)         | 1 (0.6%)       | < 0.0001 |
| 30-39                                                 | 627 (33.6%)          | 446 (33.1%)       | 181 (34.9%)    |         | 38 (1.6%)              | 34 (1.6%)        | 4 (2.6%)       |          |
| 40-49                                                 | 808 (43.3%)          | 602 (44.7%)       | 206 (39.7%)    |         | 174 (7.5%)             | 151 (7.0%)       | 23 (14.8%)     |          |
| 50-59                                                 | 242 (13.0%)          | 166 (12.3%)       | 76 (14.6%)     |         | 948 (41.1%)            | 854 (39.7%)      | 94 (60.6%)     |          |
| 60-69                                                 | 6 (0.3%)             | 6 (0.4%)          | 0 (0.0%)       |         | 1,140 (49.5%)          | 1,107 (51.5%)    | 33 (21.3%)     |          |
| <b>Gender</b>                                         |                      |                   |                |         |                        |                  |                |          |
| Woman                                                 | 1,837 (98.4%)        | 1,333(99.0%)      | 504 (97.1%)    | 0.006   | 2,283 (99.0%)          | 2,130 (99.1%)    | 153 (98.7%)    | 0.49     |
| Man                                                   | 1 (0.1%)             | 1 (0.1%)          | 0 (0.0%)       |         | 3 (0.1%)               | 3 (0.1%)         | 0 (0.0%)       |          |
| Non-Binary, GenderQueer, Agender, Two-spirit or other | 28 (1.5%)            | 13 (1.0%)         | 15 (2.9%)      |         | 19 (0.8%)              | 17 (0.8%)        | 2 (1.3%)       |          |
| <b>Indigenous</b>                                     |                      |                   |                |         |                        |                  |                |          |
| Indigenous                                            | 72 (3.9%)            | 47 (3.5%)         | 25 (4.8%)      | 0.35    | 52 (2.3%)              | 47 (2.2%)        | 5 (3.2%)       | 0.047    |
| Not Indigenous                                        | 1,706 (91.4%)        | 1,235 (91.7%)     | 471 (90.8%)    |         | 2,147 (93.1%)          | 2,008 (93.4%)    | 139 (89.7%)    |          |
| Prefer not to answer                                  | 19 (1.0%)            | 15 (1.1%)         | 4 (0.8%)       |         | 13 (0.6%)              | 10 (0.5%)        | 3 (1.9%)       |          |
| Missing                                               | 69 (3.7%)            | 50 (3.7%)         | 19 (3.7%)      |         | 93 (4.0%)              | 85 (4.0%)        | 8 (5.2%)       |          |
| <b>Latin American</b>                                 |                      |                   |                |         |                        |                  |                |          |
| Latin American                                        | 40 (2.1%)            | 25 (1.9%)         | 15 (2.9%)      | 0.21    | 21 (0.9%)              | 18 (0.8%)        | 3 (1.9%)       | 0.16     |
| Not                                                   | 1,819 (97.5%)        | 1,316 (97.7%)     | 503 (96.9%)    |         | 2,267 (98.4%)          | 2,118 (98.5%)    | 149 (96.1%)    |          |
| Missing                                               | 7 (0.4%)             | 6 (0.4%)          | 1 (0.2%)       |         |                        | 14 (0.7%)        | 3 (1.9%)       |          |

|                                      |               |               |             |       |               |               |             |       |
|--------------------------------------|---------------|---------------|-------------|-------|---------------|---------------|-------------|-------|
|                                      |               |               |             |       | 17 (0.7%)     |               |             |       |
| <b>South Asian</b>                   |               |               |             |       |               |               |             |       |
| Not                                  | 1,800 (96.5%) | 1,295 (96.1%) | 505 (97.3%) | 0.38  | 2,258 (98.0%) | 2,112 (98.2%) | 146 (94.2%) | 0.012 |
| South Asian                          | 59 (3.2%)     | 46 (3.4%)     | 13 (2.5%)   |       | 30 (1.3%)     | 24 (1.1%)     | 6 (3.9%)    |       |
| Missing                              | 7 (0.4%)      | 6 (0.4%)      | 1 (0.2%)    |       | 17 (0.7%)     | 14 (0.7%)     | 3 (1.9%)    |       |
| <b>Black</b>                         |               |               |             |       |               |               |             |       |
| Black                                | 19 (1.0%)     | 15 (1.1%)     | 4 (0.8%)    | 0.61  | 8 (0.3%)      | 8 (0.4%)      | 0 (0.0%)    | 1     |
| Not Black                            | 1,840 (98.6%) | 1,326 (98.4%) | 514 (99.0%) |       | 2,280 (98.9%) | 2,128 (99.0%) | 152 (98.1%) |       |
| Missing                              | 7 (0.4%)      | 6 (0.4%)      | 1 (0.2%)    |       | 17 (0.7%)     | 14 (0.7%)     | 3 (1.9%)    |       |
| <b>White</b>                         |               |               |             |       |               |               |             |       |
| Non-White                            | 368 (19.7%)   | 281 (20.9%)   | 87 (16.8%)  | 0.044 | 245 (10.6%)   | 222 (10.3%)   | 23 (14.8%)  | 0.077 |
| White                                | 1,491 (79.9%) | 1,060 (78.7%) | 431 (83.0%) |       | 2,043 (88.6%) | 1,914 (89.0%) | 129 (83.2%) |       |
| Missing                              | 7 (0.4%)      | 6 (0.4%)      | 1 (0.2%)    |       | 17 (0.7%)     | 14 (0.7%)     | 3 (1.9%)    |       |
| <b>Education</b>                     |               |               |             |       |               |               |             |       |
| More than high school                | 1,705 (91.4%) | 1,232 (91.5%) | 473 (91.1%) | 0.93  | 1,924 (83.5%) | 1,788 (83.2%) | 136 (87.7%) | 0.18  |
| High school or less                  | 159 (8.5%)    | 114 (8.5%)    | 45 (8.7%)   |       | 377 (16.4%)   | 358 (16.7%)   | 19 (12.3%)  |       |
| Missing                              | 2 (0.1%)      | 1 (0.1%)      | 1 (0.2%)    |       | 4 (0.2%)      | 4 (0.2%)      | 0 (0.0%)    |       |
| <b>Number of Adults in Household</b> |               |               |             |       |               |               |             |       |
| One                                  | 388 (20.8%)   | 273 (20.3%)   | 115 (22.2%) | 0.65  | 649 (28.2%)   | 601 (28.0%)   | 48 (31.0%)  | 0.51  |
| Three or more                        | 364 (19.5%)   | 263 (19.5%)   | 101 (19.5%) |       | 526 (22.8%)   | 488 (22.7%)   | 38 (24.5%)  |       |
| Two                                  | 1,113 (59.6%) | 810 (60.1%)   | 303 (58.4%) |       | 1,121 (48.6%) | 1,052 (48.9%) | 69 (44.5%)  |       |
| Missing                              | 1 (0.1%)      | 1 (0.1%)      | 0 (0.0%)    |       | 9 (0.4%)      | 9 (0.4%)      | 0 (0.0%)    |       |
| <b>Children &lt; 5</b>               |               |               |             |       |               |               |             |       |
| None                                 | 1,514 (81.1%) | 1,079 (80.1%) | 435 (83.8%) | 0.095 | 2,225 (96.5%) | 2,076 (96.6%) | 149 (96.1%) | 0.39  |
| One                                  | 239 (12.8%)   | 185 (13.7%)   | 54 (10.4%)  |       | 23 (1.0%)     | 22 (1.0%)     | 1 (0.6%)    |       |

|                                  |               |             |             |          |               |               |             |          |
|----------------------------------|---------------|-------------|-------------|----------|---------------|---------------|-------------|----------|
| Two or more                      | 70 (3.8%)     | 54 (4.0%)   | 16 (3.1%)   |          | 14 (0.6%)     | 12 (0.6%)     | 2 (1.3%)    |          |
| Missing                          | 43 (2.3%)     | 29 (2.2%)   | 14 (2.7%)   |          | 43 (1.9%)     | 40 (1.9%)     | 3 (1.9%)    |          |
| <b>Children 5-17</b>             |               |             |             |          |               |               |             |          |
| None                             | 996 (53.4%)   | 698 (51.8%) | 298 (57.4%) | 0.02     | 1,935 (83.9%) | 1,819 (84.6%) | 116 (74.8%) | 0.004    |
| One                              | 379 (20.3%)   | 271 (20.1%) | 108 (20.8%) |          | 201 (8.7%)    | 182 (8.5%)    | 19 (12.3%)  |          |
| Two or more                      | 464 (24.9%)   | 357 (26.5%) | 107 (20.6%) |          | 121 (5.2%)    | 105 (4.9%)    | 16 (10.3%)  |          |
| Missing                          | 27 (1.4%)     | 21 (1.6%)   | 6 (1.2%)    |          | 48 (2.1%)     | 44 (2.0%)     | 4 (2.6%)    |          |
| <b>Chronic Health Conditions</b> |               |             |             |          |               |               |             |          |
| None                             | 1,026 (55.0%) | 776 (57.6%) | 250 (48.2%) | 0.0003   | 998 (43.3%)   | 944 (43.9%)   | 54 (34.8%)  | 0.029    |
| One or more                      | 839 (45.0%)   | 570 (42.3%) | 269 (51.8%) |          | 1,300 (56.4%) | 1,199 (55.8%) | 101 (65.2%) |          |
| Missing                          | 1 (0.1%)      | 1 (0.1%)    | 0 (0.0%)    |          | 7 (0.3%)      | 7 (0.3%)      | 0 (0.0%)    |          |
| <b>Crisis score phase 1</b>      |               |             |             |          |               |               |             |          |
| Mean (SD)                        | 27.8 (±8.0)   | 26.6 (±7.7) | 30.9 (±8.0) | < 0.0001 | 24.9 (±7.6)   | 24.6 (±7.4)   | 28.9 (±8.8) | < 0.0001 |
| Missing                          | 63 (3.4%)     | 51 (3.8%)   | 12 (2.3%)   |          | 86 (3.7%)     | 78 (3.6%)     | 8 (5.2%)    |          |
| <b>Anxiety GAD-7 phase 1</b>     |               |             |             |          |               |               |             |          |
| Mean (SD)                        | 6.9 (±5.2)    | 6.2 (±4.9)  | 8.7 (±5.5)  | < 0.0001 | 5.0 (±4.7)    | 4.8 (±4.6)    | 7.4 (±5.5)  | < 0.0001 |
| Missing                          | 49 (2.6%)     | 40 (3.0%)   | 9 (1.7%)    |          | 106 (4.6%)    | 100 (4.7%)    | 6 (3.9%)    |          |
| <b>Depression PHQ-9 phase 1</b>  |               |             |             |          |               |               |             |          |
| Mean (SD)                        | 6.5 (±5.2)    | 5.7 (±4.7)  | 8.6 (±5.9)  | < 0.0001 | 5.0 (±4.5)    | 4.8 (±4.4)    | 7.8 (±5.7)  | < 0.0001 |
| Missing                          | 61 (3.3%)     | 51 (3.8%)   | 10 (1.9%)   |          | 144 (6.2%)    | 134 (6.2%)    | 10 (6.5%)   |          |

623  
624  
625



627 **Table 2.** Summary of free-text responses for changes noticed in menstrual cycles.  
 628 Sample sizes are given and percentages of total sample are given in parentheses.  
 629

| <b>Theme categories</b><br>Total n = 92                         | <b>Themes</b>                                                  | <b>Sub-themes</b>                                                  | <b>Participant response excerpts</b>                                                                                                                                                         |
|-----------------------------------------------------------------|----------------------------------------------------------------|--------------------------------------------------------------------|----------------------------------------------------------------------------------------------------------------------------------------------------------------------------------------------|
| <b>Non-Pandemic related</b><br>n = 29 (31.5)                    | <b>Age related</b><br>n = 15 (51.7)                            | <b>Entering perimenopause</b><br>n = 15 (51.7)                     | "I'm perimenopausal"; "perimenopausal, irregular, unpredictable"                                                                                                                             |
|                                                                 | <b>Changes to medication or contraceptives</b><br>n = 6 (20.6) | <b>Changes to birth control (patch, pill, IUD)</b><br>n = 4 (13.7) | "Removed IUD so periods are balancing out"; "Started period after going off of birth control"                                                                                                |
|                                                                 |                                                                | <b>Medication, supplements</b><br>n = 2 (6.8)                      | "— I have recently stopped taking all those supplements and have noticed that my cycle in general is longer"; "Had a period when I had xxx, otherwise I haven't had a period in a while."    |
|                                                                 | <b>Changes to reproductive system</b><br>n = 8 (27.5)          | <b>Got pregnant or intended to</b><br>n = 4 (13.7)                 | "I got pregnant in xx"; "Stopped due to positive pregnancy test"                                                                                                                             |
|                                                                 |                                                                | <b>Hysterectomy</b><br>n = 4 (13.7)                                | "Cycle starting to return after ablation"; "Had hysterectomy done in xx"                                                                                                                     |
|                                                                 | <b>Pandemic control measures</b><br>n = 63 (68.4)              | <b>Cycle length/volume changes</b><br>n = 57 (90.4)                | <b>Varying cycle timing (start/end)</b><br>n = 33 (52.3)                                                                                                                                     |
| <b>Changes in Period Length</b><br>n = 14 (22.2)                |                                                                |                                                                    | "Irregular. Both long and short"; "Periods have become more irregular, sometimes long, sometimes short with some spotting in between"                                                        |
| <b>Volume changes (more or less bleeding)</b><br>n = 10 (15.80) |                                                                |                                                                    | "they are more variable... shorter, sometimes very light, other quite heavy and with more severe cramps"; "Short, long and light or heavy period. No idea what is happening sort of periods" |
| <b>Periods are more symptomatic</b><br>n = 6 (9.5)              |                                                                | <b>Mood symptoms</b><br>n = 3 (4.7)                                | "More mood swings"; "Weird timing and more moody"                                                                                                                                            |
|                                                                 |                                                                | <b>Painful</b><br>n = 3 (4.7)                                      | "Extreme cramping throughout month of April"; "Worse migraines"                                                                                                                              |

630  
631

632 **Table 3.** Summary of free-text responses for changes noticed in postmenopausal  
 633 status. Sample sizes are given and percentages of total sample are given in  
 634 parentheses.  
 635

| Theme categories<br>Total n = 111                 | Themes                                                   | Sub-themes                                                       | Participant response excerpts                                                                                                                         |
|---------------------------------------------------|----------------------------------------------------------|------------------------------------------------------------------|-------------------------------------------------------------------------------------------------------------------------------------------------------|
| <b>Non-pandemic related</b><br>n = 22 (19.8)      | <b>Surgery</b><br>n = 10 (45.4)                          | <b>Hysterectomy/Ovarian cysts</b><br>n = 10 (45.4)               |                                                                                                                                                       |
|                                                   | <b>Changes to medication</b><br>n = 7 (31.8)             | <b>Hormone replacement therapy (HRT) changes</b><br>n = 7 (31.8) | “My postmenopausal symptoms became more severe because of changes in HRT prescription.”; “...tr(ied) a few replacement medications.”                  |
|                                                   | <b>Pre-existing conditions</b><br>n = 5 (22.7)           | <b>Endometriosis and cancer</b><br>n = 5 (22.7)                  | “I had endometrial biopsy xx procedure”; “Bleeding due to bladder cancer”                                                                             |
| <b>Pandemic control measures</b><br>n = 89 (80.1) | <b>Menopause symptoms have worsened</b><br>n = 69 (77.5) | <b>Hot flashes and insomnia</b><br>n = 46 (51.6)                 | “Hot flashes- haven’t had them in years.”; “More insomnia and hot flashes, and painful dry eyes which I didn’t have before.”                          |
|                                                   |                                                          | <b>Mood symptoms</b><br>n = 13 (14.6)                            | “Felt lonely and depressed and hopeless”; “More emotional and stronger symptoms”                                                                      |
|                                                   |                                                          | <b>Vaginal dryness and skin irritation</b><br>n = 7 (7.8)        | “Vaginal dryness, painful sex, sweats”; “More skin irritation”                                                                                        |
|                                                   |                                                          | <b>Headaches/Migraines</b><br>n = 2 (2.2)                        | “Migraine headaches, hot flashes”; “Headaches”                                                                                                        |
|                                                   | <b>Irregular changes to health</b><br>n = 20 (22.4)      | <b>Bleeding/abdominal pain</b><br>n = 9 (10.1)                   | “One episode of postmenopausal bleeding”; “Abdominal pain and cramps in middle lower area.”                                                           |
|                                                   |                                                          | <b>Weight changes and hair loss</b><br>n = 8 (8.9)               | “Slower metabolism/weight gain in different areas of body”; “More Uti’s”                                                                              |
|                                                   |                                                          | <b>Memory loss</b><br>n = 1 (1.1)                                | “Memory is getting bad...feeling for words often.”; “I have felt more symptoms such as brain fog and hot flashes which I assume are hormone related.” |

636  
 637  
 638



639 **Figure 1** Changes to menstrual and menopausal status during early COVID-19  
640 pandemic increased mean CoRonavlrus Health Impact survey (CRISIS) scores, anxiety  
641 (GAD-7) and depression symptoms (PHQ-9) in women+. A) Mean ( $\pm 95\%$ CI) CRISIS  
642 scores in women+ with changes to menstrual status were 3.4 points higher. B) Mean  
643 ( $\pm 95\%$ CI) GAD-7 scores in women+ with changes to menstrual status were 2 points  
644 higher. C) Mean ( $\pm 95\%$ CI) PHQ-9 scores in women+ with changes to menstrual status  
645 were 2.4 D) Mean( $\pm 95\%$ CI) CRISIS scores in women+ with changes to menopausal  
646 status were 2.9 points higher. E) Mean ( $\pm 95\%$ CI) GAD-7 scores in women+ with  
647 changes to menopausal status were 1.5 points higher. F) Mean( $\pm 95\%$ CI) PHQ-9 scores  
648 in women+ with changes to menopausal status were 1.8 points higher. CI=confidence  
649 interval. Figure was constructed in R v.4.1.3.

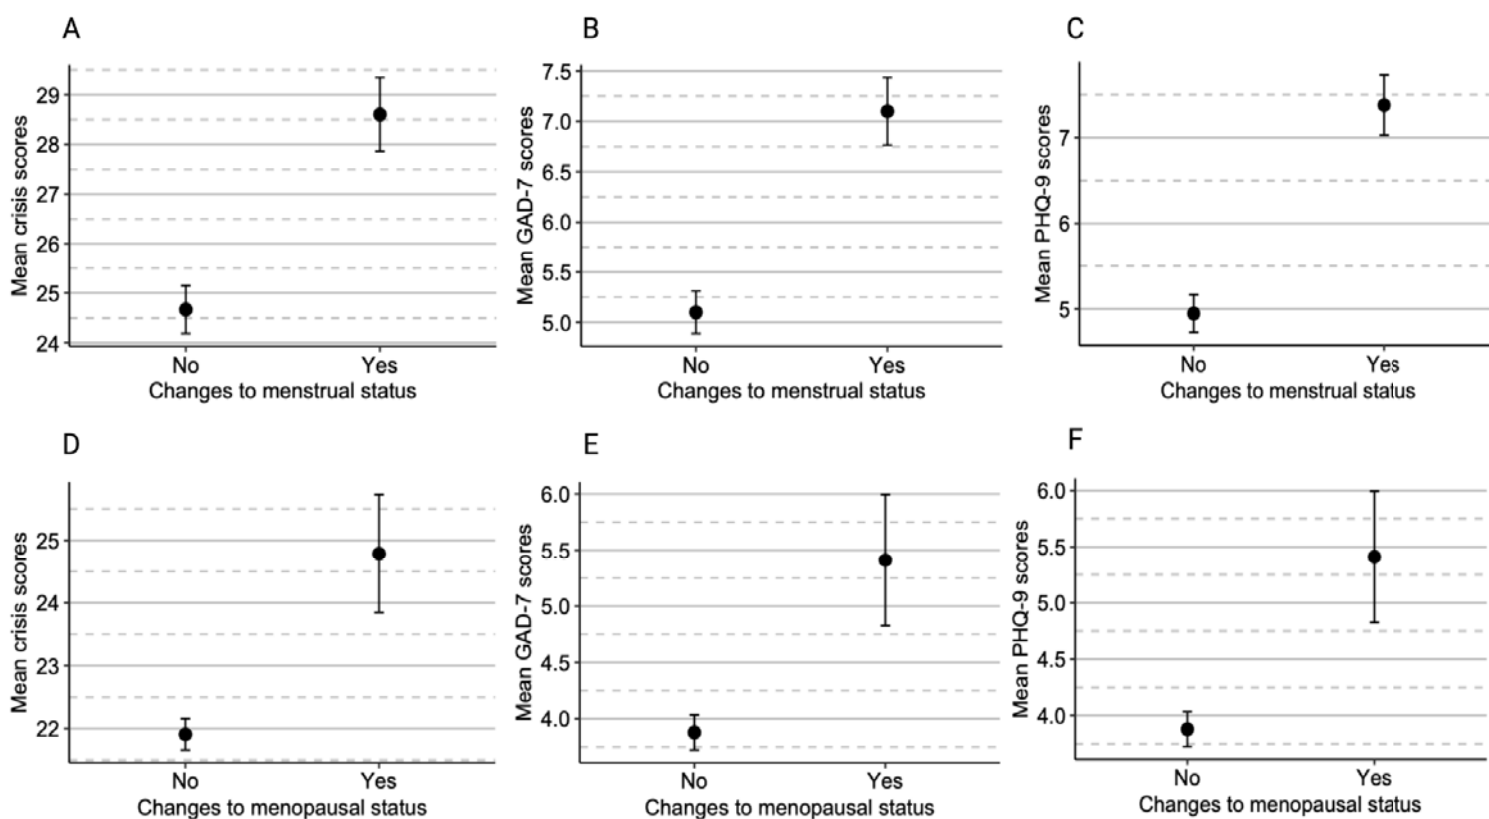

650

651

652

## Supplement

653

1. Are you postmenopausal (have not had a period in 1 year or more)?

654

- Yes

655

- No

656

2. [If “No” to question 1] Since the COVID-19 pandemic and subsequent public

657

health measures in mid-March 2020, have you noticed any changes to your

658

menstrual cycle?

659

- Yes

660

- No

661

- Not applicable: I have a suppressed menstrual cycle due to hormonal

662

contraception, breast feeding, a medical condition, etc.

663

- Not applicable: other

664

3. [If “yes” to question 2] What changes have you noticed to your menstrual cycle?

665

- Periods have gotten shorter

666

- Periods have gotten longer

667

- Periods are more symptomatic (painful, more bleeding, etc.)

668

- Periods are less symptomatic

669

- More periods than normal

670

- Fewer periods than normal

671

- Other

672

4. [If “other” to question 3] What other changes in your menstrual cycle have you

673

noticed since COVID-19?

674 5. [If “yes” to question 1] Have you noticed any changes to your postmenopausal  
675 status since mid-March 2020?

676 • Yes

677 • No

678 6. [If “yes” to question 5] What changes have you noticed?

679 • Started bleeding again

680 • More menstrual symptoms

681 • Other

682 7. [If “other” to question 6] Please specify the "Other" changes you have  
683 experienced in your postmenopausal status

684

685

686

687
